# Supplementary material for: Environmental and Hydrological Changes of Lake Coatetelco in Central Mesoamerica (Southwest Mexico) Over the Holocene and Comparison With Climatic Forcing
Source: Frontiers journal article supplement (doi:10.3389/fevo.2022.809949), 2022-06-14
Supplement: Table_1.xlsx [file Table_1.xlsx]

## Sheet: COA-N2-2019
Depth (cm)	Age (cal yr BP)	TOC (%)	CaCO3 (%)	C/N	d13Corg (permil, vs VPDB)	Si (%)	Ti (%)	Al (%)	Fe (%)	Mg (%)	Ca (%)	Na (%)	K (%)	P (%)	Rb (ppm)	Sr (ppm)	Zr (ppm)	Cu (ppm)	Zn (ppm)	CIA	PIA
50-52	2130	0.76	0.1666	12.6667	-16.4901	28.8027	0.534	4.54765	1.673	1.02	2.34286	0.682581	0.0247183	0.0196479	35	419	205	36	62	64.4783	65.447
55-57	2155	0.74	0.6664	14.8	-16.8709	28.8073	0.522	4.65882	1.6485	0.996	2.21429	0.701129	0.0192254	0.0152817	35	412	206	37	63	66.6517	67.7923
60-62	2180	0.66	0.0833	13.2	-16.0822	28.9847	0.504	4.60853	1.666	1.056	2.25	0.68629	0.0219718	0.0174648	34	423	208	37	62	65.0951	66.0872
65-67	2205	0.71	0.7497	14.2	-16.327	28.462	0.546	4.62706	1.687	1.05	2.42143	0.671452	0.0109859	0.00873239	35	418	203	38	60	65.6	66.6149
70-72	2230	0.64	2.3324	12.8	-15.7988	28.2147	0.534	4.47618	1.652	1.074	2.92143	0.656613	0.0164789	0.0130986	34	434	202	36	59	65.6134	66.6809
75-77	2255	0.67	3.332	16.75	-16.1565	27.2533	0.504	4.42853	1.6065	1.068	3.88571	0.638065	0.0164789	0.0130986	33	453	196	37	58	61.8398	62.587
80-82	2280	0.6	6.1642	15	-15.7026	26.5907	0.504	4.24588	1.582	1.098	4.93571	0.608387	0.0247183	0.0196479	33	451	190	35	56	61.0604	61.7806
85-87	2305	0.69	2.3324	17.25	-16.4023	26.236	0.45	4.29618	1.5925	1.104	5.05	0.575	0.00274648	0.0021831	43	235	210	47	85	53.5928	53.7854
90-92	2330	0.67	3.0821	16.75	-15.8751	27.412	0.492	4.42059	1.666	1.146	3.52143	0.586129	0.0192254	0.0152817	35	434	204	38	60	63.9725	64.9281
95-97	2491	0.81	3.1654	20.25	-16.3144	28.6347	0.534	4.71971	1.7745	1.17	3.48571	0.604677	0.0164789	0.0130986	46	241	229	42	86	65.8388	66.9382
100-102	2742	0.66	14.994	16.5	-16.2893	23.3987	0.408	3.78	1.484	1.14	8.64286	0.46371	0.0137324	0.0109155	32	492	177	33	50	54.9901	55.3143
105-107	2993	0.58	5.2479	14.5	-15.941	27.258	0.528	4.52382	1.7465	1.152	3.31429	0.530484	0.00549296	0.0043662	39	418	212	39	62	71.528	73.2376
110-112	3245	0.49	12.0785	12.25	-16.1398	24.15	0.45	4.05	1.596	1.164	7.2	0.452581	0.0164789	0.0130986	35	463	188	35	53	59.5852	60.2339
115-117	3496	0.48	11.9119	16	-16.2747	25.116	0.468	4.28294	1.708	1.164	5.55714	0.46	0.0137324	0.0109155	38	408	195	38	57	71.9036	73.7348
120-122	3747	0.47	17.493	11.75	-16.3678	23.758	0.456	4.11882	1.6905	1.17	6.75714	0.426613	0.0164789	0.0130986	36	407	182	35	53	77.4187	79.87
125-127	3999	0.42	18.0761	14	-16.5017	23.31	0.438	4.07382	1.6695	1.182	7.49286	0.400645	0.0247183	0.0196479	35	388	177	35	52	72.8174	74.6938
130-132	4250	0.41	30.5711	13.6667	-17.2066	17.8267	0.366	3.18706	1.3685	1.134	14.5571	0.311613	0.0247183	0.0196479	26	430	129	27	40	45.5548	45.3365
135-137	4595	0.23	31.654	7.66667	-17.0131	18.7833	0.33	3.39353	1.4735	1.158	13.2429	0.315323	0.0192254	0.0152817	29	427	136	28	42	56.5504	56.9495
140-142	4941	0.27	33.4866	13.5	-17.74	18.2093	0.36	3.34588	1.4105	1.158	14.15	0.322742	0.0219718	0.0174648	27	461	131	26	41	54.086	54.306
145-147	5286	0.35	39.7341	11.6667	-18.285	15.512	0.288	2.90912	1.246	1.146	17.4571	0.289355	0	0	22	550	116	21	35	41.4448	41.1026
150-152	5631	0.22	33.5699	11	-19.1301	17.6027	0.33	3.465	1.4455	1.122	14.6714	0.356129	0.0219718	0.0174648	24	558	142	21	42	51.9516	52.0394
155-157	5977	0.56	31.4041	28	-21.3778	16.2633	0.324	3.20029	1.288	1.026	16.4786	0.370968	0.0164789	0.0130986	22	464	131	21	40	38.6406	38.2493
160-162	6322	0.17	1.2495	8.5	-20.7774	26.6653	0.522	5.21735	2.1035	1.224	2.46429	0.652903	0.0357042	0.0283803	32	414	223	36	71	69.8155	71.045
165-167	6667	0.13	7.497	6.5	-20.6007	23.5293	0.468	4.35706	1.806	1.188	7.62143	0.586129	0.0302113	0.0240141	29	433	179	31	57	51.0133	51.0633
170-172	7013	0.13	0.2499	6.5	-20.9647	26.9873	0.582	4.86794	2.135	1.98	3.5	1.06839	0.0192254	0.0152817	26	563	165	27	70	56.566	56.9364
175-177	7283	0.17	0.3332	8.5	-20.9301	27.4913	0.552	4.84676	2.065	1.626	3	0.949677	0.0302113	0.0240141	32	498	182	30	68	59.9504	60.6141
180-182	7517	0.19	0.1666	9.5	-20.1488	27.7387	0.528	4.85471	2.1	1.356	2.35714	0.715968	0.0274648	0.021831	34	404	205	36	73	65.5082	66.5335
185-187	7750	0.2	0.1666	10	-21.3537	27.7433	0.516	4.86529	2.093	1.362	2.32857	0.701129	0.0302113	0.0240141	37	412	206	36	74	65.8117	66.9299
190-192	7983	0.26	0.3332	13	-21.5964	26.992	0.558	4.77529	2.0755	1.254	3.07857	0.697419	0.0384507	0.0305634	36	407	201	36	71	61.682	62.4586
195-197	8217	0.24	-0.0833	12	-21.747	27.622	0.534	4.90765	2.1105	1.272	2.29286	0.738226	0.0302113	0.0240141	34	412	206	36	71	65.3092	66.3597
200-202	8450	0.18	0	6	-21.7773	27.8133	0.552	4.91559	2.1175	1.242	2.04286	0.641774	0.0357042	0.0283803	33	373	209	39	72	68.3159	69.5656
205-207	8683	0.13	-0.0833	6.5	-21.2492	27.4867	0.516	4.91029	2.058	1.734	3.07857	1.035	0.0219718	0.0174648	27	522	174	29	69	58.3292	58.8421
210-212	8917	0.11	0	5.5	-22.4049	28.1353	0.462	4.84147	1.792	1.662	3.52857	1.35403	0.0274648	0.021831	28	608	156	24	63	53.4229	53.6769
215-217	9150	0.12	-0.0833	6	-23.0743	27.7807	0.504	4.87059	1.8935	1.734	3.54286	1.29097	0.0302113	0.0240141	26	604	156	25	67	53.965	54.2431
220-222	9331	0.24	1.7493	8	-22.0514	27.398	0.486	4.75412	1.981	1.11	2.93571	0.619516	0.0384507	0.0305634	35	353	201	40	73	66.1957	67.3623
225-227	9360	0.29	0.5831	9.66667	-20.609	27.566	0.504	4.78588	2.023	1.128	2.50714	0.630645	0.0439437	0.0349296	37	357	206	40	75	66.2916	67.4884
230-232	9389	0.26	0.1666	8.66667	-21.4322	27.9253	0.486	4.88382	2.086	1.14	1.94286	0.57871	0.0439437	0.0349296	42	337	217	42	78	69.809	71.4277
235-237	9417	0.26	0.0833	8.66667	-21.5033	27.8927	0.516	4.88912	2.072	1.134	1.91429	0.560161	0.0302113	0.0240141	41	333	217	41	76	69.718	71.3251
240-242	9446	0.3	1.7493	10	-21.3161	27.622	0.498	4.82559	2.0825	1.104	2.12143	0.563871	0.0549296	0.043662	41	325	213	42	77	72.8841	74.8458
245-247	9475	0.31	0.4165	10.3333	-21.4144	27.8833	0.504	4.91824	2.128	1.092	1.9	0.552742	0.0219718	0.0174648	41	319	217	42	75	70.6999	72.3818
250-252	9503	0.3	0.0833	10	-21.2115	27.7247	0.51	4.95265	2.0895	1.11	1.69286	0.500806	0.0219718	0.0174648	41	292	206	43	81	72.1159	73.8948
255-257	9532	0.35	0	11.6667	-23.2311	27.5753	0.498	5.02412	2.163	1.158	1.62143	0.441452	0.0384507	0.0305634	44	296	218	45	87	73.999	75.8352
260-262	9560	0.36	0	12	-22.2805	27.356	0.492	5.11412	2.2225	1.11	1.42857	0.356129	0.0247183	0.0196479	45	258	225	46	89	76.6818	78.6565
265-267	9589	0.39	0	5.57143	-22.3867	26.908	0.492	5.19882	2.191	1.152	1.34286	0.304194	0.0274648	0.021831	43	235	210	47	85	78.5297	80.5724
270-272	9618	0.52	0.0833	7.42857	-22.3127	26.964	0.51	5.22794	2.254	1.218	1.34286	0.304194	0.0274648	0.021831	46	241	229	42	86	78.7629	80.9025
275-277	9646	0.44	0	6.28571	-21.7245	26.7727	0.474	5.14059	2.338	1.242	1.29286	0.267097	0.0274648	0.021831	46	228	225	42	83	79.1678	81.3894
280-282	9675	0.44	0	7.33333	-20.7572	26.9127	0.504	5.12206	2.359	1.242	1.29286	0.278226	0.0247183	0.0196479	46	233	225	43	83	78.8022	81.0526
285-287	9703	0.39	0.1666	7.8	-21.2185	26.978	0.504	5.09559	2.303	1.218	1.4	0.274516	0.0164789	0.0130986	44	229	224	42	82	78.2244	80.3668
290-292	9732	0.36	0.3332	7.2	-23.4768	26.32	0.54	5.64618	1.8305	0.822	1.6	0.430323	0.0494366	0.0392958	28	312	258	50	83	78.0709	79.6737
295-297	9761	0.45	0.2499	9	-24.6939	26.2033	0.492	5.84471	1.54	0.678	1.66429	0.46	0.0549296	0.043662	24	340	273	52	86	77.8159	79.2947
300-302	9789	0.61	0.1666	12.2	-21.4298	27.0527	0.486	5.22	2.0685	1.032	1.33571	0.281935	0.0302113	0.0240141	39	210	230	47	81	79.8069	81.7298
305-307	9818	0.5	0.0833	10	-19.4443	28.8167	0.462	4.33588	1.848	0.882	1.43571	0.330161	0.0357042	0.0283803	42	223	226	47	82	74.7226	76.677
310-312	9847	0.72	0.1666	14.4	-16.1739	29.694	0.468	4.08176	1.6905	0.792	1.47143	0.441452	0.0357042	0.0283803	39	232	206	49	96	71.5013	73.4608
315-317	9875	0.77	0	15.4	-15.5305	27.7853	0.516	5.09294	2.17	1.068	1.35	0.296774	0.0137324	0.0109155	36	270	209	50	88	77.8488	79.8684
320-322	9904	0.67	0.0833	13.4	-16.9611	27.286	0.522	4.97912	2.135	1.026	1.55	0.396935	0.0439437	0.0349296	38	264	220	48	89	75.3812	77.3303
325-327	9932	0.56	0.1666	11.2	-16.8986	26.978	0.486	5.02147	2.1455	1.164	1.65	0.378387	0.0439437	0.0349296	42	259	218	46	91	75.1523	77.1353
330-332	9961	0.44	0.4998	8.8	-17.4952	26.9593	0.48	4.98971	2.086	1.176	1.87143	0.422903	0.0439437	0.0349296	41	278	209	45	89	73.6981	75.5401
335-337	9990	0.47	0.3332	11.75	-17.4254	27.0107	0.456	5.01353	2.086	1.23	1.95714	0.46	0.0384507	0.0305634	43	292	212	44	88	72.0045	73.7695
340-342	10018	0.47	0.6664	11.75	-18.0064	26.8287	0.474	5.14059	2.079	1.326	2.20714	0.441452	0.0274648	0.021831	41	291	209	38	90	71.7147	73.3221
345-347	10047	0.28	2.8322	7	-19.1871	26.208	0.528	5.06118	2.0265	1.338	3.02857	0.448871	0.0329577	0.0261972	39	301	200	37	81	71.2153	72.7805
350-352	10076	0.29	1.666	9.66667	-19.767	26.628	0.534	5.11941	2.072	1.344	2.6	0.485968	0.0274648	0.021831	39	304	209	37	81	70.9634	72.4853
355-357	10104	0.23	1.3328	7.66667	-21.3111	26.5113	0.528	5.12206	2.051	1.356	2.5	0.497097	0.0219718	0.0174648	37	286	180	36	80	70.5381	72.0375
360-362	10133	0.09	4.4982	3	-21.6162	25.718	0.462	4.96059	1.995	1.29	3.70714	0.497097	0.0219718	0.0174648	37	319	200	35	76	69.4786	70.8725
365-367	10161	0.2	5.5811	6.66667	-21.7547	25.6153	0.492	4.92353	1.8935	1.266	4.23571	0.519355	0.0137324	0.0109155	35	328	198	34	75	68.0226	69.2772
370-372	10190	0.25	1.0829	8.33333	-22.2565	26.6653	0.516	5.15647	2.0265	1.284	2.62857	0.582419	0.0302113	0.0240141	35	338	206	36	78	68.539	69.842
375-377	10618	0.18	4.4982	6	-24.1848	25.55	0.528	5.00559	2.0195	1.302	4.00714	0.652903	0.0247183	0.0196479	31	376	191	34	73	66.3073	67.3785
380-382	11046	0.18	0.1666	6	-23.4518	29.6473	0.33	4.45765	1.379	0.708	2.06429	1.17968	0.0466901	0.0371127	45	362	215	30	71	58.3229	59.7437
385-387	11285	0.22	1.3328	11	-24.0807	29.1247	0.36	4.40735	1.3545	0.858	2.93571	1.27242	0.0439437	0.0349296	30	286	111	25	69	55.3222	56.1313
390-392	11334	0.14	0.0833		-24.6679	30.9773	0.228	4.14265	1.099	0.606	2.13571	1.4171	0.0384507	0.0305634	52	375	202	22	69	53.162	53.8009
395-397	11383	0.14	0.0833	7	-25.1323	31.1267	0.24	4.095	1.0465	0.546	2.04286	1.43935	0.0466901	0.0371127	47	318	158	22	69	53.1366	53.7994
400-402	11432	0.11	0.0833	5.5	-24.9896	30.9867	0.258	4.12412	1.0815	0.588	2.14286	1.43935	0.0494366	0.0392958	52	381	202	22	69	53.0317	53.6424
405-407	11481	0.13	0.0833		-25.2551	30.7627	0.258	4.12676	1.106	0.612	2.21429	1.44677	0.0411972	0.0327465	50	383	190	23	69	53	53
410-412	11530	0.17	0		-25.3603	30.4033	0.282	4.20618	1.1795	0.714	2.4	1.43565	0.0411972	0.0327465	48	412	194	22	69	52	53
